# Supplementary material for: Physiological, Biochemical, and Metabolic Responses to Short and Prolonged Saline Stress in Two Cultivated Cardoon Genotypes
Source: PubMed Central journal article supplement (PMC7284779; doi:10.3390/plants9050554), 2020-04-27
Supplement: plants-09-00554-s001.pdf [file plants-09-00554-s001.pdf]

# Physiological, biochemical and metabolic responses to short and prolonged saline stress in two cultivated cardoon genotypes

Teresa Docimo <sup>\*1</sup>, Rosalba De Stefano <sup>1</sup>, Elisa Cappetta <sup>1</sup>, Anna Lisa Piccinelli <sup>2</sup>, Rita Celano <sup>2</sup>, Monica De Palma <sup>1</sup>, Marina Tucci <sup>\*1</sup>.

<sup>1</sup> Institute of Bioscience and BioResources, National Research Council, Via Università 100, 80055 Portici (NA), Italy

[Teresa.docimo@ibbr.cnr.it](mailto:Teresa.docimo@ibbr.cnr.it), (T.D.) [destefano.rosalba@libero.it](mailto:destefano.rosalba@libero.it), (R. D.S) [elisa.cappetta@ibbr.cnr.it](mailto:elisa.cappetta@ibbr.cnr.it), (E.C) [monica.depalma@ibbr.cnr.it](mailto:monica.depalma@ibbr.cnr.it), (M. D.P.) [marina.tucci@ibbr.cnr.it](mailto:marina.tucci@ibbr.cnr.it) (M.T.)

<sup>2</sup> Department of Pharmacy, University of Salerno, Via Giovanni Paolo II 132, 84084 Fisciano (SA), Italy

[apiccinelli@unisa.it](mailto:apiccinelli@unisa.it), (A.L. P) [rcelano@unisa.it](mailto:rcelano@unisa.it) (R. C.)

\*Correspondence: [teresa.docimo@ibbr.cnr.it](mailto:teresa.docimo@ibbr.cnr.it), [marina.tucci@ibbr.cnr.it](mailto:marina.tucci@ibbr.cnr.it).

## Supplementary Material

Table S1 List of primers used for qRT- PCR analysis in this study

| Gene name    | Function                                                   | Accession    | Primer sequence                                                              |
|--------------|------------------------------------------------------------|--------------|------------------------------------------------------------------------------|
| <i>HCT</i>   | Hydroxycinnamoyl-CoA:shikimate hydroxycinnamoyltransferase | DQ104740     | F5GCTAACACGAGACCAAGTCAATGCA<br>R5CACCGCCAAACATGACCAGAGA                      |
| <i>HQT</i>   | Hydroxycinnamoyl-CoA quinate transferase                   | DQ915590     | F5-TCA CAC AGG TTA CAC GCT TCA ACT G<br>R5-GGG CTT TAT CGG ACC ATG TAT TGA T |
| <i>F3'H</i>  | Flavonoid 3'-hydroxylase                                   | HM153534     | F5 CCTGCAAAGCGTGACGAAGA<br>F3 ACGACGTCACCGCCATTTTT                           |
| <i>FNSII</i> | Flavone synthase                                           | JN825735     | F5 CGGCTGCAACGGATAACAACA<br>F3 CTCGCGATTTGAGCACCTT                           |
| <i>MYB12</i> | MYB Transcription factor                                   | MG517449     | F5TGAGGTTTGAAGGTGATGACACGC<br>R5GCCTTTTTTGCATTTCCACACTC                      |
| <i>GAS</i>   | Germacrene A synthase                                      | JN383985     | F5-CAAGACGTTTGGTGTGTCGG-3<br>R5-TCTCTTGGCTTGAGACACCC-3                       |
| <i>GAO</i>   | Germacrene A oxidase                                       | KF752449     | F5-GCCCTGAGTTCCCATTGACA-3<br>R5-TCAGTTCGGAATCGCCCAT-3                        |
| <i>COS</i>   | Costunolide synthase                                       | KF752452     | F5-AATCGTAAACGCCTGGGCA-3<br>R5-TGAACTCGAAGTCTGCACCC-3                        |
| <i>ACTIN</i> | Actin                                                      | XM_025103545 | F5-TACTTTCTACAACGAGCTTC-3<br>R5-ACATGATTTGAGTCATCTTC-3                       |

**Table S2 (–)-UHPLC-HRMS/MS data of compounds detected in cardoon leaves**

| .N | tR (min) | [M–H] <sup>–</sup> (m/z) | Molecular Formula                               | ppm   | Diagnostic product ions (m/z)                                                                                                                                          | Compound <sup>a</sup>               | Ref. |
|----|----------|--------------------------|-------------------------------------------------|-------|------------------------------------------------------------------------------------------------------------------------------------------------------------------------|-------------------------------------|------|
| 1  | 4.2      | 353.0857                 | C <sub>16</sub> H <sub>18</sub> O <sub>9</sub>  | – 2.9 | 191.0543, C <sub>7</sub> H <sub>11</sub> O <sub>6</sub> <sup>–</sup> (– 3.7 ppm); 179.0331, C <sub>9</sub> H <sub>7</sub> O <sub>4</sub> <sup>–</sup> (– 4.5 ppm)      | chlorogenic acid <sup>a</sup>       | -    |
| 2  | 5.4      | 337.0909                 | C <sub>16</sub> H <sub>18</sub> O <sub>8</sub>  | – 2.7 | 191.0542, C <sub>7</sub> H <sub>11</sub> O <sub>6</sub> <sup>–</sup> (– 4.2 ppm); 163.0383, C <sub>9</sub> H <sub>7</sub> O <sub>3</sub> <sup>–</sup> (– 3.7 ppm)      | p-coumaroylquinic acid              | 1    |
| 3  | 6.0      | 367.1012                 | C <sub>17</sub> H <sub>20</sub> O <sub>9</sub>  | – 3.2 | 193.0490, C <sub>10</sub> H <sub>9</sub> O <sub>4</sub> <sup>–</sup> (– 2.6 ppm); 191.0544, C <sub>7</sub> H <sub>11</sub> O <sub>6</sub> <sup>–</sup> (– 3.1 ppm)     | feruloylquinic acid                 | 1    |
| 4  | 7.4      | 515.1177                 | C <sub>25</sub> H <sub>24</sub> O <sub>12</sub> | – 1.5 | 353.0850, C <sub>16</sub> H <sub>17</sub> O <sub>9</sub> <sup>–</sup> (– 4.8 ppm); 191.0542, C <sub>7</sub> H <sub>11</sub> O <sub>6</sub> <sup>–</sup> (– 4.2 ppm)    | 1,3-diCQA                           | 2    |
| 5  | 8.7      | 593.1466                 | C <sub>27</sub> H <sub>30</sub> O <sub>15</sub> | – 5.8 | 285.0385 (C <sub>15</sub> H <sub>9</sub> O <sub>6</sub> , – 3.1 ppm)                                                                                                   | luteolin-O-rutinoside               | 2    |
| 6  | 9.0      | 447.0905                 | C <sub>21</sub> H <sub>20</sub> O <sub>11</sub> | – 3.8 | 285.0382 (C <sub>15</sub> H <sub>9</sub> O <sub>6</sub> , – 3.9 ppm)                                                                                                   | luteolin-7-O-glucoside <sup>a</sup> | -    |
| 7  | 9.2      | 461.0693                 | C <sub>21</sub> H <sub>18</sub> O <sub>12</sub> | – 4.7 | 285.0382 (C <sub>15</sub> H <sub>9</sub> O <sub>6</sub> , – 4.2 ppm)                                                                                                   | luteolin-O-glucuronide              | 2    |
| 8  | 11.0     | 515.1165                 | C <sub>25</sub> H <sub>24</sub> O <sub>12</sub> | – 3.6 | 353.0852, C <sub>16</sub> H <sub>17</sub> O <sub>9</sub> <sup>–</sup> (– 4.2 ppm); 173.0436, C <sub>7</sub> H <sub>9</sub> O <sub>5</sub> <sup>–</sup> (– 4.7 ppm)     | 3,4-diCQA                           | 3    |
| 9  | 12.1     | 515.1160                 | C <sub>25</sub> H <sub>24</sub> O <sub>12</sub> | – 4.7 | 353.0858, C <sub>16</sub> H <sub>17</sub> O <sub>9</sub> <sup>–</sup> (– 2.5 ppm); 191.0542, C <sub>7</sub> H <sub>11</sub> O <sub>6</sub> <sup>–</sup> (– 4.2 ppm)    | 1,5-diCQA                           | 2    |
| 10 | 12.6     | 515.1157                 | C <sub>25</sub> H <sub>24</sub> O <sub>12</sub> | – 5.2 | 353.0856, C <sub>16</sub> H <sub>17</sub> O <sub>9</sub> <sup>–</sup> (– 3.1 ppm); 191.0543, C <sub>7</sub> H <sub>11</sub> O <sub>6</sub> <sup>–</sup> (– 3.7 ppm)    | 3,5-diCQA                           | 3    |
| 11 | 14.2     | 515.1168                 | C <sub>25</sub> H <sub>24</sub> O <sub>12</sub> | – 3.0 | 353.0852, C <sub>16</sub> H <sub>17</sub> O <sub>9</sub> <sup>–</sup> (– 4.3 ppm); 173.0436, C <sub>7</sub> H <sub>9</sub> O <sub>5</sub> <sup>–</sup> (– 5.1 ppm)     | 4,5-diCQA                           | 2    |
| 12 | 17.2     | 533.0897                 | C <sub>24</sub> H <sub>22</sub> O <sub>14</sub> | – 5.4 | 489.1020, [M–H–CO <sub>2</sub> ] <sup>–</sup> (–1.5 ppm); 285.0380, C <sub>15</sub> H <sub>9</sub> O <sub>6</sub> (– 4.8 ppm)                                          | luteolin-O-malonylglucoside         | 4    |
| 13 | 19.9     | 391.1374 <sup>b</sup>    | C <sub>20</sub> H <sub>24</sub> O <sub>8</sub>  | – 3.3 | 289.1065 [C <sub>15</sub> H <sub>16</sub> O <sub>3</sub> +HCOO] <sup>–</sup> (–1.9 ppm); 101.0229 C <sub>4</sub> H <sub>5</sub> O <sub>3</sub> <sup>–</sup> (–4.2 ppm) | cynaropicrin                        | *    |
| 14 | 20.4     | 285.0387                 | C <sub>15</sub> H <sub>10</sub> O <sub>6</sub>  | – 2.4 | 241.0489, [M–H–CO <sub>2</sub> ] <sup>–</sup> (–2.6 ppm); 151.0020, <sup>1,3</sup> A <sup>–</sup> (– 4.0 ppm)                                                          | Luteolin <sup>a</sup>               | -    |
| 15 | 21.7     | 269.0438                 | C <sub>15</sub> H <sub>10</sub> O <sub>5</sub>  | – 2.3 | 225.0539, [M–H–CO <sub>2</sub> ] <sup>–</sup> (– 3.2 ppm); 151.0019, <sup>1,3</sup> A <sup>–</sup> (– 4.5 ppm)                                                         | Apigenin <sup>a</sup>               | -    |

<sup>a</sup> Compared with reference standards; <sup>b</sup> m/z values corresponding to [M+HCOOH–H]<sup>–</sup>;

References: 1. ref 37 in main manuscript; 2. Reference 35 in the manuscript; 3. Ref 36 in the manuscript; 4. Ref 59 in the manuscript.

\*. Database mzCloud.

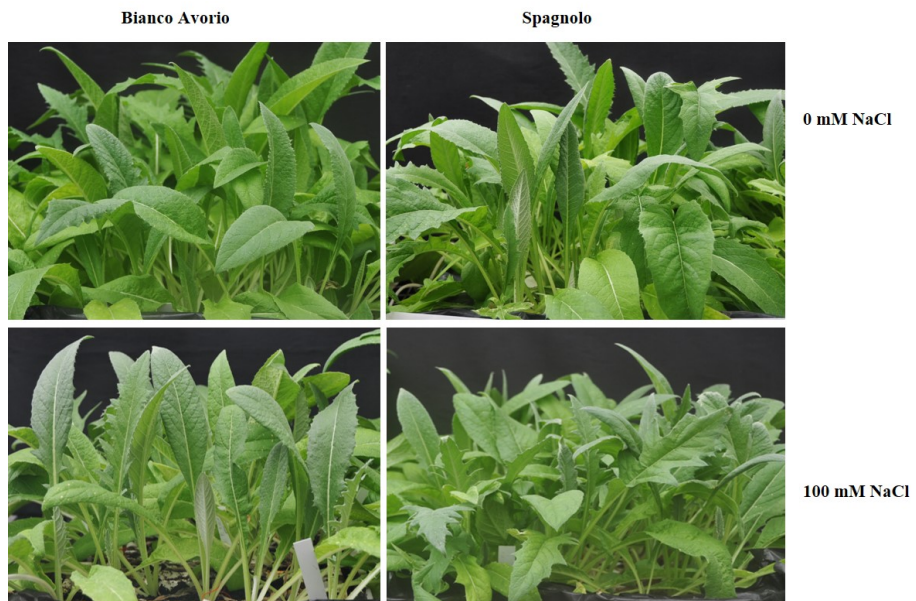

**Figure S. 1** Phenotype of “Bianco Avorio” and “Spagnolo” *C. cardunculus var altilis* genotypes at 21 days of hydroponic cultivation in 0 mM NaCl and 100 mM NaCl nutrient solutions.

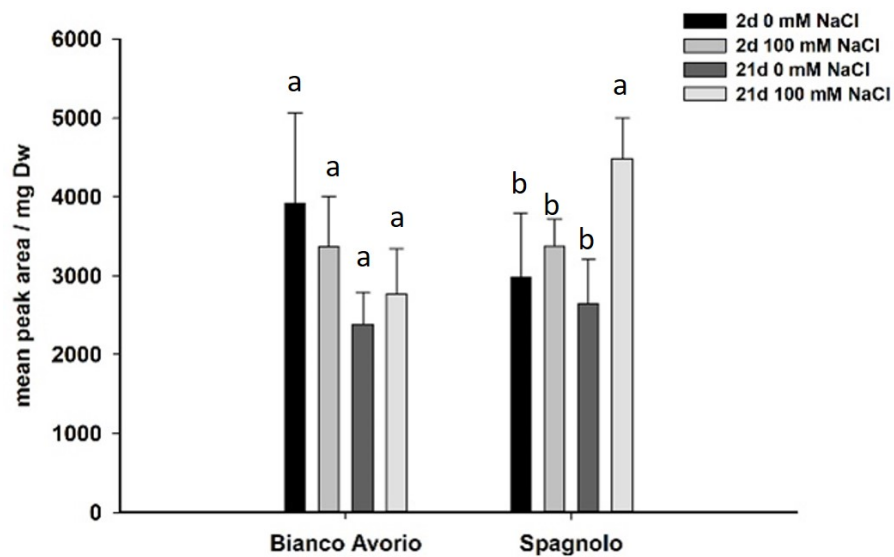

**Figure S. 2.** UHPLC-UV analysis of cynaropicrin accumulation in plants of the “Bianco Avorio” and “Spagnolo” *C. cardunculus var altis* genotypes after 2 and 21 days of hydroponic cultivation in control (0 mM NaCl) and 100 mM NaCl nutrient solutions. Each value represents the mean  $\pm$  SD of three biological replicates. Different superscript letters indicate significant differences between genotypes and treatments within each sampling time, according to one way ANOVA ( $P < 0.05$ ).
